# Supplementary material for: Hierarchical nanoparticle-induced superhydrophilic and under-water superoleophobic Cu foam with ultrahigh water permeability for effective oil/water separation
Source: Royal Society of Chemistry journal article supplement (doi:10.1039/c6ta04487e), 2016-01-01
Supplement: c6ta04487e1.pdf [file c6ta04487e1.pdf]

Supplementary Material (ESI) for Journal of Material Chemistry A:

## Hierarchical nanoparticles-induced superhydrophilic and underwater superoleophobic Cu foam with ultrahigh water permeability for effective oil/water separation

Zhi-Yong Luo, Kai-Xuan Chen, Jun-Hui Wang, Dong-Chuan Mo\* and Shu-Shen Lyu\*

School of Chemical Engineering and Technology, Sun Yat-sen University, Guangzhou 510275, China.

E-mail: [modongch@mail.sysu.edu.cn](mailto:modongch@mail.sysu.edu.cn) and [lvshsh@mail.sysu.edu.cn](mailto:lvshsh@mail.sysu.edu.cn); Fax: +86-020-84112150

### Electronic Supplementary Information

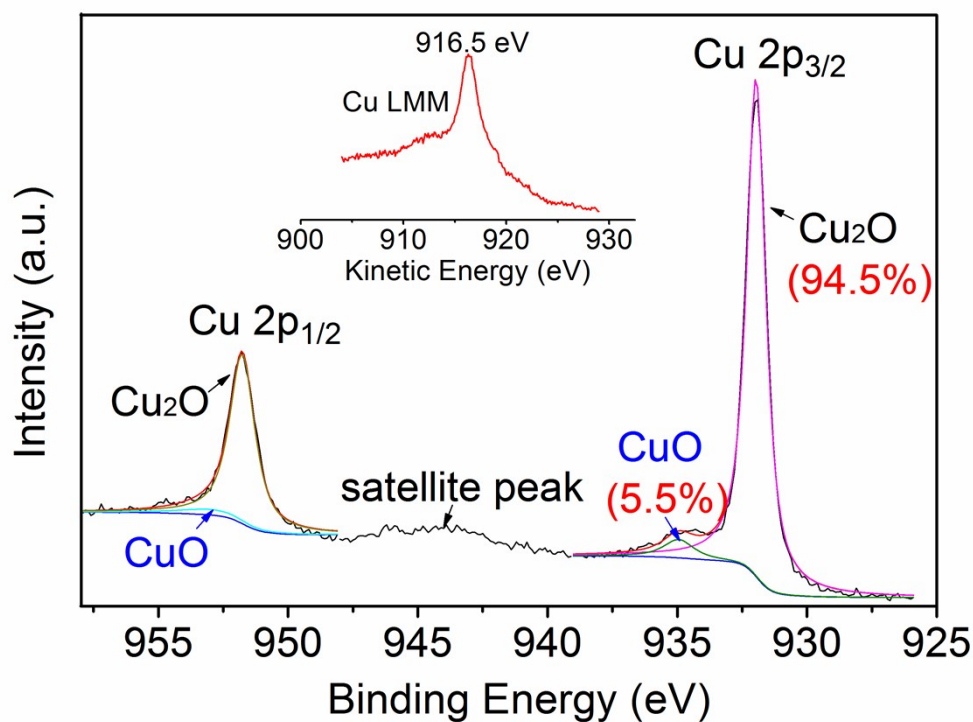

Fig. S1 XPS analysis of surface Cu species after anodization

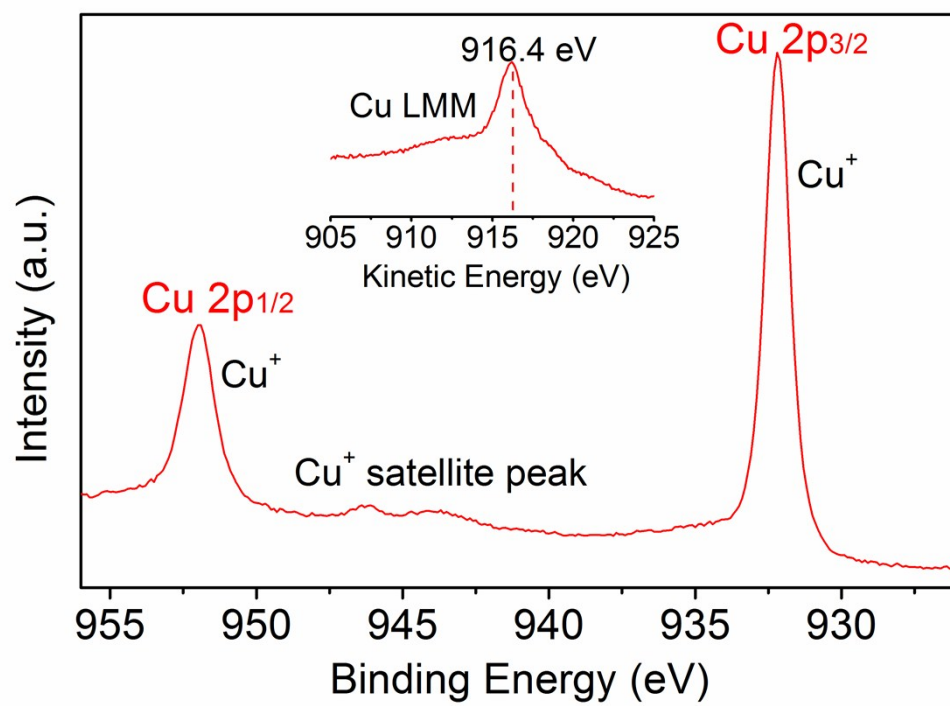

**Fig. S2** XPS analysis of surface Cu species after HCl etching

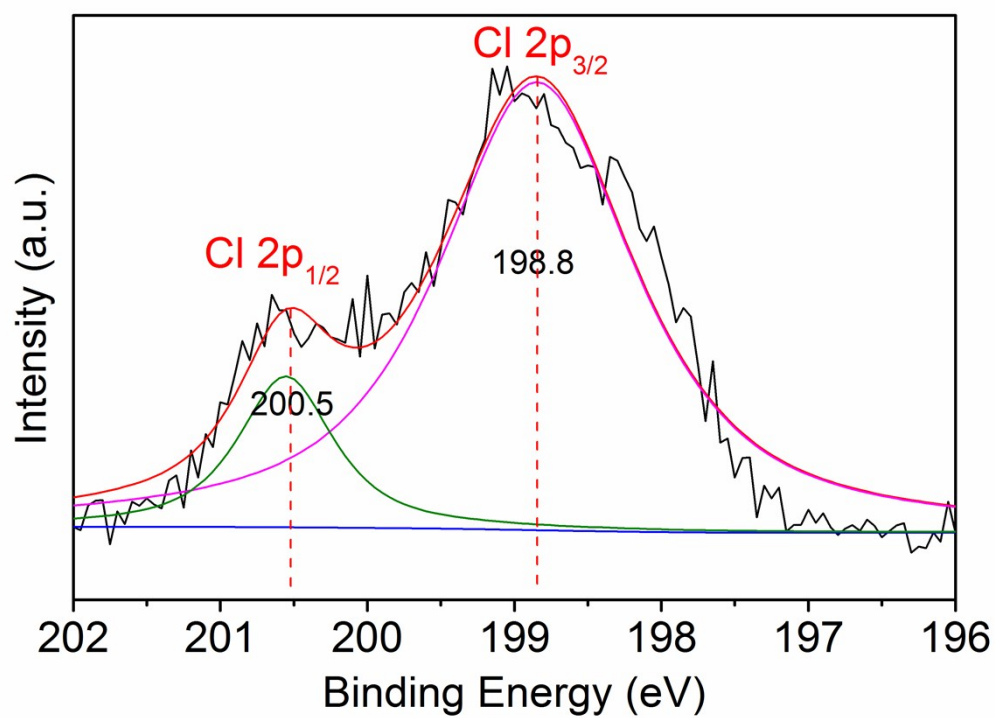

**Fig. S3** XPS analysis of surface Cl species after HCl etching

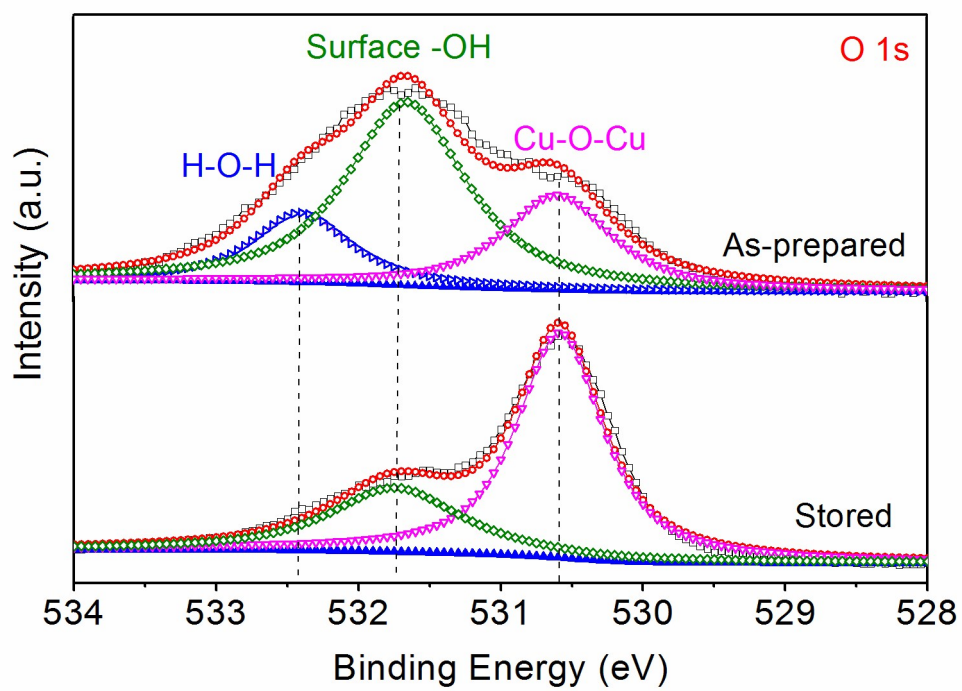

**Fig. S4** O 1s spectrum of anodized Cu foam before and after storing for 3 months

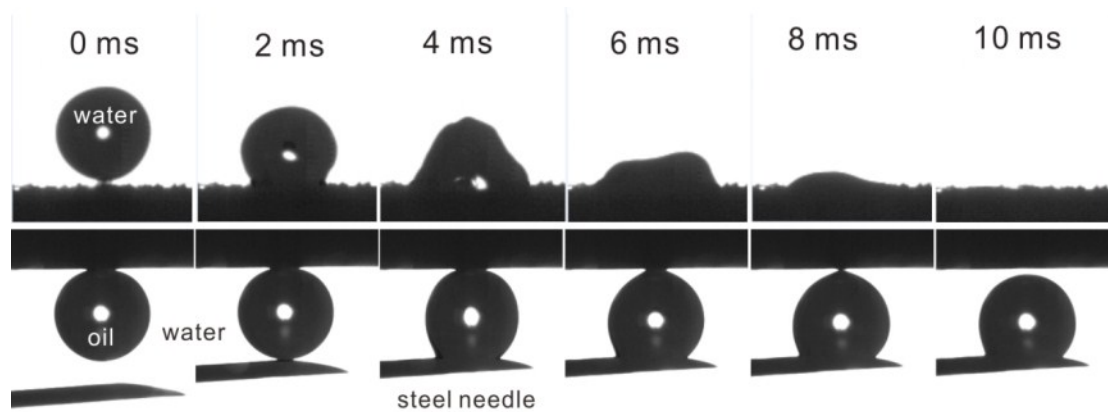

**Fig. S5** High-speed dynamic images of 5 µl water droplet spreading out on as-prepared anodized Cu foam, and the corresponding underwater oil adhesive effect.

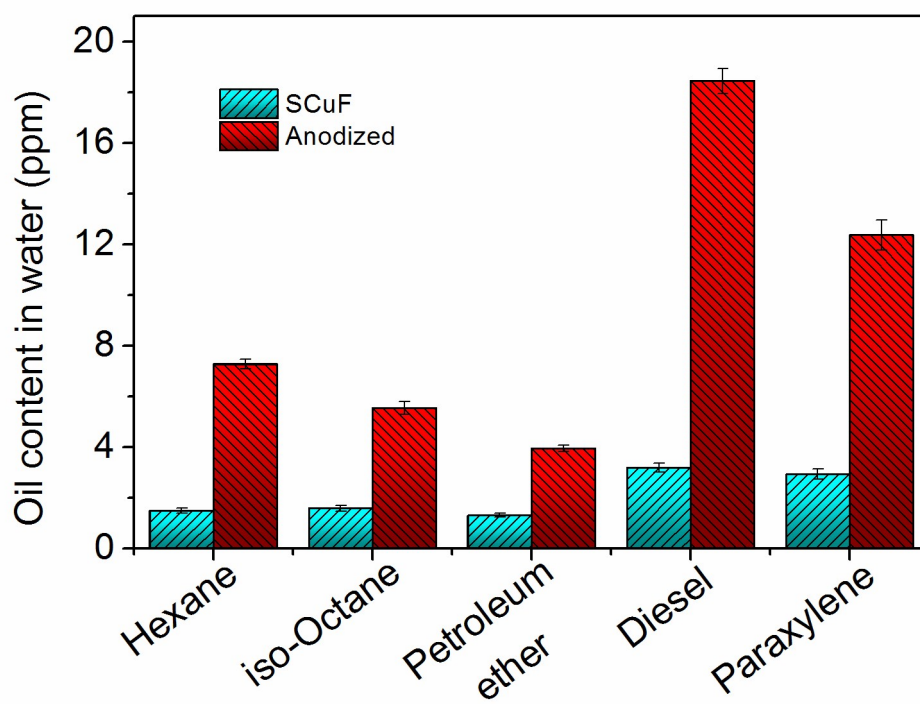

**Fig. S6** the oil/water separation performance of anodized Cu foam and SCuF, respectively.

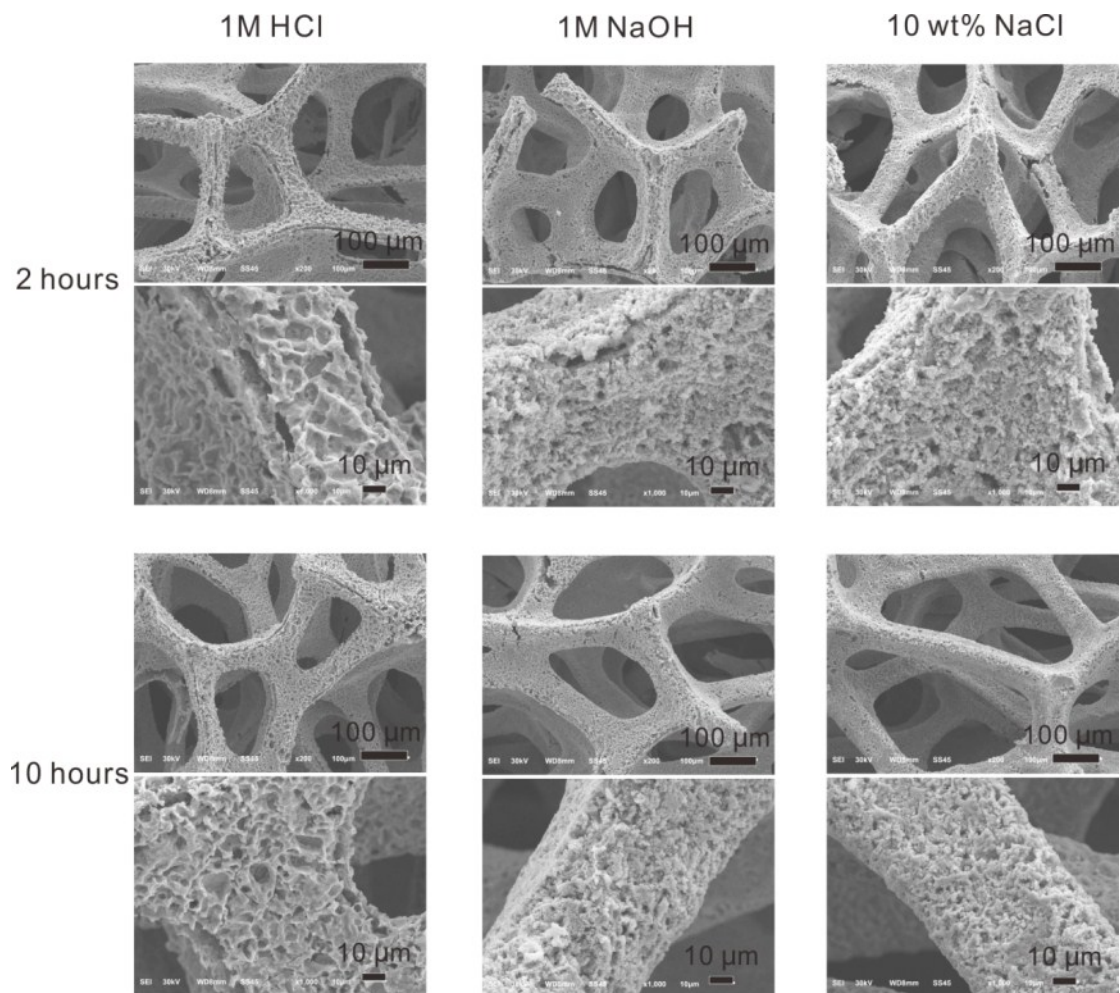

**Fig. S7** the morphologies of SCuF after immersing in corrosive solution for 2 h and 10 h, respectively.
